# Supplementary material for: At the dawn of delegation? Experiences and attitudes of general practitioners in Germany – a questionnaire survey
Source: Springer Nature journal article supplement (doi:10.1186/s12875-017-0697-y), 2017-12-01
Supplement: MOESM1 [file 15319568]

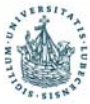

## Attitudes towards the concept of task shifting within general practice

Dear colleagues,

Thank you for your participation. This survey is anonymous. Your answers will be analyzed from the Institute of Family Medicine, University Hospital Campus Luebeck. The information provided will be treated as strictly confidential. These data will not be released to third parties.

### Task shifting

**1. How is your attitude towards the concept task shifting?**

- Positive attitude
  Partly positive attitude
  Negative attitude

**2. Under which condition are you willing to shift tasks? (Multiple answers possible)**

- Not at all
  need for qualified staff  
 Need for adequate payment for staff  
 Other namely: \_\_\_\_\_

**3. Which tasks you already delegate? (Multiple answers possible)**

|                                                         |                          |
|---------------------------------------------------------|--------------------------|
|                                                         |                          |
| Take the patient's history                              | <input type="checkbox"/> |
| Measure of:                                             |                          |
| - blood pressure                                        | <input type="checkbox"/> |
| - blood glucose                                         | <input type="checkbox"/> |
| Conduct/ record:                                        |                          |
| - electrocardiogram                                     | <input type="checkbox"/> |
| - spirometry testing                                    | <input type="checkbox"/> |
| Take blood sample                                       | <input type="checkbox"/> |
| Perform vaccination                                     | <input type="checkbox"/> |
| Inspect wounds                                          | <input type="checkbox"/> |
| Conduct standardized tests (e.g. <i>Barthel-Index</i> ) | <input type="checkbox"/> |
| Provide advice (e.g. diet, exercise)                    | <input type="checkbox"/> |
| Other namely:                                           |                          |
| _____                                                   |                          |

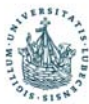

4. Task shifting can be lead to ... (Multiple answers possible)

|                                                              | Yes                      | No                       |
|--------------------------------------------------------------|--------------------------|--------------------------|
| a. Time savings.                                             | <input type="checkbox"/> | <input type="checkbox"/> |
| b. Provision of health care for a larger number of patients. | <input type="checkbox"/> | <input type="checkbox"/> |
| c. More time for individual patients.                        | <input type="checkbox"/> | <input type="checkbox"/> |
| d. Increase in own satisfaction.                             | <input type="checkbox"/> | <input type="checkbox"/> |

5. Which concerns did you have towards task shifting? (Multiple answers possible)

|                                                                               |                          |
|-------------------------------------------------------------------------------|--------------------------|
| a. Substitutions in important aspects of health care.                         | <input type="checkbox"/> |
| b. Information loss due to the interface.                                     | <input type="checkbox"/> |
| c. Lack of acceptance by patients.                                            | <input type="checkbox"/> |
| d. Lack of clear definition of tasks for different health care professionals. | <input type="checkbox"/> |
| e. Competition against me as the GP.                                          | <input type="checkbox"/> |
| f. Lack of clarity about responsibilities and legal situations.               | <input type="checkbox"/> |
| g. Lack of financial incentive.                                               | <input type="checkbox"/> |
| h. Other namely :                                                             |                          |

Demographic and practice characteristics

6. How many GPs working in the practice?

\_\_\_\_\_(number)

7. How many physician's assistants working in the practice?

\_\_\_\_\_(number)

8. How many home visits will be done per week?

\_\_\_\_\_(number)

9. How old are you?

\_\_\_\_ years

10. You are ...

male

female



11. How many years did you working as a GP?  < 5     5-10     11-20     > 20 years

12. In which district did you working? *(Please indicate your location designation.)*

|  |  |  |  |
|--|--|--|--|
|  |  |  |  |
|--|--|--|--|

13. What kind of aspects did you missing in the survey?

---

---

---

---

---

**Thank you for your participation!**
